# Supplementary material for: The relationship between the accuracy of curling athletes’ duration judgment and delivery performance
Source: PeerJ. 2022 Jun 14;10:e13541. doi: 10.7717/peerj.13541 (PMC9205314; doi:10.7717/peerj.13541)
Supplement: Supplemental Information 1 — All results of behavioral measures, EEG measures, and pot-dropping performance measures. [file peerj-10-13541-s001.xlsx]

## Sheet: behavioral data 
curler			non-athletes
Number	General situation	special situation	Number	General situation	special situation
101	1033.84	583.29	201	836.82	1971.55
102	1254.93	353.75	202	1056.12	1467.85
103	1305.35	690.1	203	1561.43	3360.47
104	1381.25	268.43	204	1203.63	386.92
105	1386.07	558.63	205	1818.54	4576.7
106	817.12	957.3	206	1188.6	1580.28
107	1382.8	621.8	207	897.15	1448.4
108	1325.75	525.45	208	661.24	1500.31
109	568.87	482.48	209	533.9	1747.12
110	1057.07	917.68	210	1542.08	361.85
111	1218.67	290.82	211	1529.4	586.48
112	1214.38	407.28	212	1755.2	346.15
113	1154.25	386.15	213	1577.65	1983.98
114	1261.03	393.32	214	3545.4	3173.33
115	1368.42	584.08	215	955.47	2519.25
116	1346.13	469.33	216	1748.03	603.22
117	1286.45	752.98	217	1855.7	599.22
118	1400.3	240.82	218	1975.65	549.28
119	1387.6	525.57	219	1948.67	422.15
120	1170.05	355.35	220	912.32	1328.93
121	1209.98	722.13	221	980.52	1534
122	1047.98	310.1	222	1760.37	321.6
123	857.3	410.37	223	1907.58	326.25
124	908.67	481.65	224	473.38	1532.57
125	894.13	736.07	225	1471.17	774.55
126	628.63	875.95	226	2454.5	618.1
127	1088.37	855.87	227	521.4	2408.33
128	1035.3	704.82	228	1660.5	429.15

## Sheet: T1-ALPHA
curler			non-athletes
Number	General situation	special situation	Number	General situation	special situation
101	16.1	14.04	201	0.21	0.21
102	7.17	6.3	202	0.92	1.52
103	8.09	10.11	203	0.25	0.21
104	1.39	3.96	204	0.21	0.24
105	6.71	8.22	205	0.19	0.19
106	4.39	3.61	206	0.22	0.24
107	2.44	2.51	207	0.21	0.2
108	14.69	14.26	208	0.31	0.33
109	12.83	16.1	209	0.3	0.39
110	1.14	1.18	210	0.9	0.68
111	7.37	9.63	211	0.19	0.19
112	8.02	7.96	212	3.37	2.82
113	4.76	6.9	213	0.1	0.11
114	4.37	6.42	214	0.15	0.17
115	5.16	6.29	215	0.2	0.2
116	3.85	4.02	216	0.2	0.16
117	3.5	3.46	217	0.31	0.32
118	2.5	2.29	218	0.17	0.2
119	4.61	5.93	219	0.49	0.42
120	5.91	6.76	220	0.63	0.77
121	2.23	2.04	221	0.19	0.19
122	10.58	11.47	222	0.4	0.33
123	1.89	2.3	223	0.45	0.53
124	20.61	20.05	224	0.45	0.37
125	8.01	7.43	225	0.34	0.44
126	10.31	10.8	226	0.47	0.42
127	5.57	5.27	227	0.24	0.28
128	2.01	3.09	228	0.17	0.22

## Sheet: T2-ALPHA
curler			non-athletes
Number	General situation	special situation	Number	General situation	special situation
101	7.47	10.51	201	0.12	0.13
102	5.89	5.93	202	0.97	1.56
103	7.61	10.42	203	0.21	0.18
104	0.73	3.36	204	0.15	0.17
105	5.45	7.1	205	0.17	0.16
106	3.62	2.65	206	0.21	0.21
107	2.08	2.52	207	0.19	0.52
108	10.62	12.48	208	0.3	0.35
109	11.6	13.49	209	0.29	0.53
110	1.06	1.33	210	0.85	0.81
111	10.06	16	211	0.16	0.15
112	6.7	8.5	212	4.37	2.79
113	7.62	7.76	213	0.09	0.09
114	4.84	6.12	214	0.11	0.13
115	4.9	7.13	215	0.16	0.16
116	3.22	3.81	216	0.19	0.15
117	3.73	4.32	217	0.32	0.36
118	1.82	1.8	218	0.14	0.18
119	4.21	4.75	219	0.51	0.4
120	3.76	4.42	220	0.73	0.75
121	2.08	1.83	221	0.13	0.13
122	10.27	11.72	222	0.34	0.28
123	1.47	1.83	223	0.38	0.4
124	17.65	18.04	224	0.46	0.36
125	7	8.52	225	0.25	0.36
126	9.27	11.05	226	0.3	0.27
127	6.42	8.45	227	0.21	0.19
128	1.76	2.85	228	0.14	0.17

## Sheet: T2-theta
curler			non-athletes
Number	General situation	special situation	Number	General situation	special situation
101	2.52	2.51	201	0.36	0.33
102	6.4	5.04	202	0.67	0.58
103	2.41	3.49	203	0.23	0.16
104	1.49	1.82	204	0.29	0.31
105	5.63	5.7	205	0.4	0.35
106	2.27	2.24	206	0.31	0.32
107	1.95	2.21	207	0.38	0.36
108	2.6	2.26	208	1.12	0.76
109	2.43	2.38	209	0.54	0.38
110	1.11	1.39	210	0.63	0.64
111	4.84	4.62	211	0.34	0.35
112	4.35	4.47	212	0.87	0.75
113	1.72	2.81	213	0.14	0.14
114	4.01	4.32	214	0.36	0.4
115	3.43	4.29	215	0.4	0.44
116	3.04	3.11	216	0.34	0.33
117	2.71	3.18	217	0.38	0.41
118	2.04	2.3	218	0.42	0.38
119	3.78	2.94	219	0.63	0.45
120	3.63	3.56	220	0.36	0.35
121	4.65	4.86	221	0.33	0.31
122	1.94	2.15	222	0.34	0.34
123	4.7	6.43	223	0.65	0.67
124	7.01	9.04	224	0.34	0.48
125	7.87	7.4	225	0.5	0.43
126	2.92	3.21	226	0.28	0.27
127	2.55	2.86	227	0.23	0.24
128	1.22	1.23	228	0.3	0.31

## Sheet: correlation
Number	delivering performance	General situation	special situation
101	2.75	1033.84	583.29
102	3.075	1254.93	353.75
103	2.2	1305.35	690.1
104	3.225	1381.25	268.43
105	2.775	1386.07	558.63
106	2.725	817.12	957.3
107	2.95	1382.8	621.8
108	2.775	1325.75	525.45
109	2.8	568.87	482.48
110	2.35	1057.07	917.68
111	3.125	1218.67	290.82
112	2.75	1214.38	407.28
113	3.05	1154.25	386.15
114	3.025	1261.03	393.32
115	2.75	1368.42	584.08
116	2.9	1346.13	469.33
117	2.5	1286.45	752.98
118	3.325	1400.3	240.82
119	2.775	1387.6	525.57
120	3.075	1170.05	355.35
121	2.7	1209.98	722.13
122	3.1	1047.98	310.1
123	2.925	857.3	410.37
124	2.825	908.67	481.65
125	2.7	894.13	736.07
126	2.4	628.63	875.95
127	2.45	1088.37	855.87
128	2.7	1035.3	704.82
